# Supplementary material for: DNAJB6 mutants display toxic gain of function through unregulated interaction with Hsp70 chaperones
Source: Nat Commun. 2023 Nov 3;14:7066. doi: 10.1038/s41467-023-42735-z (PMC10624832; doi:10.1038/s41467-023-42735-z)
Supplement: Supplementary file 6 — Source data [file 41467_2023_42735_MOESM6_ESM.xlsx]

## Sheet: Fig1ed
Figure 1 panels d and e source data
	TDP-43 aggregation
		Half time of aggregation	Repeat 1	Repeat 2	Repeat 3	Repeat 4	Average	Err
	no chaperone		306	279	291	280	289	12.5698
	DNAJB6 WT		546	444	477	521	497	45.4093
	DNAJB6 ΔST		249	281	295	261	271.5	20.4858
	DNAJB6 F89I		526	584	426	480	504	67.1913
	DNAJB6 F91L		492	525	483	506	501.5	18.303
	DNAJB6 F93L		524	522	507	525	519.5	8.42615
	DNAJB6 P96R		490	510	470	536	501.5	28.2076
	DNAJB6 A50V		564	465	510	438	494.25	55.1747
	DNAJB6 F100V		444	501	464	507	479	30.0998
	PolyQ-48 aggregation
		Half time of aggregation	Repeat 1	Repeat 2	Repeat 3	Repeat 4	Repeat 5	Repeat 6	Average	Err
	no chaperone		149	152	156	174	179	171	163.5	11.5866
	DNAJB6 WT		346	376	351	321	356	342	348.667	16.4486
	DNAJB6 ΔST		171	181	155	161			167	9.89949
	DNAJB6 F89I		366	339	367	347	327		349.2	15.4971
	DNAJB6 F91L		311	381	391	326	371	347	354.5	29.0617
	DNAJB6 F93L		311	291	361	341			326	26.9258
	DNAJB6 A50V		341	326	389	340	318	381	349.167	26.6422
	DNAJB6 F100V		341	401	382	407	370	367	378	22.1359
	pH 7		Repeat 1	Repeat 2	Repeat 3	Repeat 4		Average	Err
	no chaperone		208	237	213	187		211.25	20.5325
	DNAJB6 WT		360	380	370	326		359	23.4663
	DNAJB6 P96R		346	404	379	312		360.25	39.9865

## Sheet: Fig2b
Figure 2 panel b source data
DNAJB6 JD+Hsp70
Assignment	I/I0
3DN-H	0.93
4YN-H	0.534444
5YN-H	0.730635
6EN-H	0.587763
7VN-H	0.572662
8LN-H	0.567466
9GN-H	0.682084
10VN-H	0.805672
11QN-H	0.787057
12RN-H	0.558128
13HN-H	0.704863
14AN-H	0.670032
15SN-H	0.554464
17EN-H	0.641169
18DN-H	0.607772
19IN-H	0.479636
20KN-H	0.558662
21KN-H	0.517819
22AN-H	0.576365
23YN-H	0.567102
24RN-H	0.429143
25KN-H	0.504955
26LN-H	0.410532
27AN-H	0.0191208
28LN-H	0.0638309
29KN-H	0.0804028
30WN-H	0.106058
31HN-H	0.0193622
33DN-H	0.0429371
34KN-H	0.453797
35NN-H	0.471837
37EN-H	0.307067
38NN-H	0.196591
39KN-H	0.373443
40EN-H	0.648666
41EN-H	0.368451
42AN-H	0.741147
43EN-H	0.508845
44RN-H	0.52125
45KN-H	0.432012
46FN-H	0.219311
47KN-H	0.087767
48QN-H	0.0491853
49VN-H	0.0282432
50AN-H	0.0180897
51EN-H	0.498511
52AN-H	0.598143
53YN-H	0.405632
54EN-H	0.49792
55VN-H	0.60473
56LN-H	0.567054
57SN-H	0.555155
58DN-H	0.719674
59AN-H	0.695176
60KN-H	0.701036
61KN-H	0.615081
62RN-H	0.514198
63DN-H	0.628403
64IN-H	0.604609
65YN-H	0.582792
66DN-H	0.655833
67KN-H	0.674484
68YN-H	0.833624
69GH-H	0.85

## Sheet: Fig4b
Figure 4 panel b source data
		Hsp70	WT	F89I	F91I	F93L	E54A	P96R	A50V	F100V	JD
	Repeat 1	0.193274	0.257216	0.399055	0.499237	0.483866	0.785762	0.839139	1.24748	1.3642	1.53988
	Repeat 2	0.180609	0.271392	0.44636	0.582926	0.685668	1.03873	0.77957	1.24064	1.63729	1.63124
	Repeat 3	0.208615	0.34908	0.51696	0.65531	0.776503	0.657525	0.806992	1.10508	1.68976	1.897
	Repeat 4	0.201591	0.32567	0.3561	0.514521	0.534627	0.952429	0.750254	1.22902	1.86708	1.90582
	Repeat 5	0.218224	0.346714	0.31378	0.5651	0.8976	1.21765	0.8556	1.09139
	Repeat 6	0.179205	0.359595			0.801782	0.627497		1.51612
	Repeat 7	0.192442	0.364083
	Repeat 8	0.203066	0.284508
	Repeat 9		0.333387
	Repeat 10		0.32323
	Average	0.197128	0.319782	0.406451	0.563419	0.696674	0.879931	0.806311	1.23829	1.63959	1.74348
	Fold of activation	0.98564	1.59891	2.03226	2.81709	3.48337	4.39966	4.03155	6.19144	8.19793	8.71742

## Sheet: Fig4c-j
DNAJB6 JD-GF+Hsp70			DNAJB6 JD-GF F89I+Hsp70			DNAJB6 JD-GF F91I+Hsp70			DNAJB6 JD-GF F93L+Hsp70			DNAJB6 JD-GF F96R+Hsp70			DNAJB6 JD-GF A50V+Hsp70			DNAJB6 JD-GF F100V+Hsp70			DNAJB6 JD+Hsp70
Assignment	I/I0		Assignment	I/I0		Assignment	I/I0		Assignment	I/I0		Assignment	I/I0		Assignment	I/I0		Assignment	I/I0		Assignment	I/I0
3ASPN-H	0.923077		3ASPNN-H	0.535544		3AspHN-H	0.807644		3ASPN-H	0.748921		3DN-H	0.721359		3AspHN-H	0.555782		3AspHN-H	0.479474		3DN-H	0.93
4TYRN-H	1.00339		4TYRNN-H	0.504579		4TyrHN-H	0.739422		4TYRN-H	0.707143		4YN-H	0.550403		4TyrHN-H	0.494715		4TyrHN-H	0.571926		4YN-H	0.534444
5TYRN-H	0.897619		5TYRNN-H	0.604691		5TyrHN-H	0.777738		5TYRN-H	0.648426		5YN-H	0.574212		5TyrN-HN	0.50682		5TyrN-H	0.544783		5YN-H	0.730635
6GLUN-H	0.913462		6GLUNN-H	0.510326		6GluHN-H	0.830594		6GLUN-H	0.604756		6EN-H	0.594144		6GluHN-H	0.59575		6GluHN-H	0.579719		6EN-H	0.587763
7VALN-H	0.882353		7VALNN-H	0.539105		7ValHN-H	0.696078		7VALN-H	0.613981		7VN-H	0.520696		7ValHN-H	0.500465		7ValHN-H	0.553271		7VN-H	0.572662
8LEUN-H	0.885827		8LEUNN-H	0.538709		8LeuHN-H	0.743673		8LEUNN-H	0.578736		8LN-H	0.567577		8LeuHN-H	0.48373		8LeuHN-H	0.549179		8LN-H	0.567466
9GLYN-H	0.872247		9GLYNN-H	0.628073		9GlyHN-H	0.866255		9GLYN-H	0.689697		9GN-H	0.561314		9GlyHN-H	0.458996		9GlyHN-H	0.650943		9GN-H	0.682084
10VALN-H	0.867173		10VALN-H	0.684344		10ValHN-H	0.841019		10VALN-H	0.697091		10VN-H	0.571155		10ValHN-H	0.536533		10ValHN-H	0.590064		10VN-H	0.805672
11GLNN-H	0.815789		11GLNN-H	0.638842		11GlnHN-H	0.983005		11GLNN-H	0.818774		11QN-H	0.545005		11GlnN-NH	0.504945		11GlnN-NH	0.564341		11QN-H	0.787057
12ARGN-H	0.9		12ARGN-H	0.670482		12ARGN-H	0.939149		12ARGN-H	0.731905		12RN-H	0.664711		12ArgN-NH	0.50167		12ArgN-NH	0.591675		12RN-H	0.558128
13HISN-H	0.89		13HISN-H	0.567718		13HisHN-H	0.890731		13HISN-H	0.666876		13HN-H	0.659626		13HisHN-H	0.496219		13HisHN-H	0.599682		13HN-H	0.704863
14ALAN-H	0.96325		14ALAN-H	0.549573		14AlaHN-H	0.868956		14ALAN-H	0.788602		14AN-H	0.629149		14AlaHN-H	0.480504		14AlaHN-H	0.610041		14AN-H	0.670032
15SERN-H	0.9		15SERN-H	0.620557		15SerHN-H	0.847577		15SERN-H	0.893763		15SN-H	0.548846		15SerHN-H	0.4998		15SerHN-H	0.603896		15SN-H	0.554464
17GLUN-H	0.996622		17GLUN-H	0.556573		17GluHN-H	0.731849		17GLUN-H	0.749949		17EN-H	0.46883		17GluHN-H	0.32012		17GluHN-H	0.497931		17EN-H	0.641169
18ASPN-H	0.878486		18ASPN-H	0.58151		18AspHN-H	0.780555		18ASPN-H	0.701529		18DN-H	0.551659		18AspHN-H	0.400063		18AspHN-H	0.519656		18DN-H	0.607772
19ILEN-H	0.921875		19ILEN-H	0.573317		19IleHN-H	0.643315		19ILEN-H	0.699591		19IN-H	0.674807		19IleHN-H	0.43842		19IleHN-H	0.441754		19IN-H	0.479636
20LYSN-H	0.93159		20LYSN-H	0.551993		20LysHN-H	0.424262		20LYSN-H	0.780708		20KN-H	0.684778		20LysHN-H	0.346585		20LysHN-H	0.455549		20KN-H	0.558662
21LYSN-H	0.969828		21LYSN-H	0.543773		21LysHN-H	0.387245		21LYSN-H	0.751498		21KN-H	0.58789		21LysHN-H	0.353791		21LysHN-H	0.403602		21KN-H	0.517819
22ALAN-H	0.895833		22ALAN-H	0.515967		22AlaHN-H	0.491806		22ALAN-H	0.398519		22AN-H	0.600024		22AlaHN-H	0.389438		22AlaHN-H	0.538273		22AN-H	0.576365
23TYRN-H	0.841317		23TYRN-H	0.480467		23TyrHN-H	0.516739		23TYRN-H	0.42718		23YN-H	0.570693		23TyrHN-H	0.320172		23TyrHN-H	0.465252		23YN-H	0.567102
24ARGN-H	0.820455		24ARGN-H	0.50767		24ArgHN-H	0.55151		24ARGN-H	0.371418		24RN-H	0.33352		24ArgHN-H	0.316427		24ArgHN-H	0.513054		24RN-H	0.429143
25LYSN-H	0.901786		25LYSN-H	0.437196		25LysHN-H	0.233154		25LYSN-H	0.144332		25KN-H	0.292911		25LysHN-H	0.2408		25LysHN-H	0.314623		25KN-H	0.504955
26LEUN-H	0.897368		26LEUN-H	0.402022		26LeuHN-H	0.23398		26LEUN-H	0.186678		26LN-H	0.246561		26LeuHN-H	0.173746		26LeuHN-H	0.234541		26LN-H	0.410532
27ALAN-H	0.911392		27ALAN-H	0.403175		27AlaHN-H	0.20046		27ALAN-H	0.127882		27AN-H	0.106176		27AlaHN-H	0.171034		27AlaHN-H	0.128891		27AN-H	0.0191208
28LEUN-H	0.954397		28LEUN-H	0.577583		28LeuHN-H	0.0558602		28LEUN-H	0.0880215		28LN-H	0.162598		28LeuHN-H	0.104085		28LeuHN-H	0.0978613		28LN-H	0.0638309
29LYSN-H	0.8391		29LYSN-H	0.517968		29LYSN-H	0.0726923		29LYSN-H	0.0937533		29KN-H	0.15527		29LysHN-H	0.16372		29LysHN-H	0.183233		29KN-H	0.0804028
30TRPN-H	0.95942		30TRPN-H	0.599354		30TRPN-H	0.188131		30TRPN-H	0.222154		30WN-H	0.208094		30TrpH-HE	0.187392		30TrpN-H	0.188816		30WN-H	0.106058
30TRPN-H	0.913793		31HISN-H	0.388191		31HisHN-H	0.111891		31HisN-H	0.0743501		31HN-H	0.235871		31HisHN-H	0.207504		31HisHN-H	0.177961		31HN-H	0.0193622
31HisN-H	1.03056		33ASPN-H	0.192514		33AspHN-H	0.130206		33ASPN-H	0.0632742		33DN-H	0.14505		33AspHN-H	0.120827		33AspHN-H	0.0469789		33DN-H	0.0429371
33ASPN-H	0.880435		34LYSN-H	0.387693		34LYSN-H	0.415023		34LYSN-H	0.114417		34KN-H	0.150263		34LysN-NH	0.192629		34LysN-NH	0.249236		34KN-H	0.453797
34LYSN-H	0.952381		35ASNN-H	0.359131		35ASNN-H	0.564923		35ASNN-H	0.258648		35NN-H	0.177454		35AsnHN-H	0.138833		35AsnHN-H	0.259106		35NN-H	0.471837
35ASNN-H	0.872964		37GLUN-H	0.398736		37GluHN-H	0.508685		37GLUN-H	0.252087		37EN-H	0.200135		37GluHN-H	0.219587		37GluHN-H	0.221871		37EN-H	0.307067
37GLUN-H	1.00855		38ASNN-H	0.563819		38ASNN-H	0.528575		38ASNN-H	0.393253		38NN-H	0.365059		38AsnHN-H	0.33604		38AsnHN-H	0.376122		38NN-H	0.196591
38ASNN-H	1		39LYSN-H	0.480516		39LysHN-H	0.54837		39LYSN-H	0.303198		39KN-H	0.442311		39LysHN-H	0.355362		39LysHN-H	0.305853		39KN-H	0.373443
39LYSN-H	0.970109		40GLUN-H	0.654214		40GluHN-H	0.488359		40GLUN-H	0.403819		40EN-H	0.491035		40GluHN-H	0.380019		40GluHN-H	0.414579		40EN-H	0.648666
40GLUN-H	0.903353		41GLUN-H	0.567489		41GluHN-H	0.496618		41GLUN-H	0.409924		41EN-H	0.411337		41GluN-H	0.222309		41GluN-H	0.405859		41EN-H	0.368451
41GLUN-H	0.891213		42ALAN-H	0.555915		42AlaHN-H	0.519985		42ALAN-H	0.441783		42AN-H	0.543309		43GluHN-H	0.201389		42AlaHN-H	0.468311		42AN-H	0.741147
42ALAN-H	0.818557		43GLUN-H	0.559149		43GluHN-H	0.542599		43GLUN-H	0.42348		43EN-H	0.482129		44ArgHN-H	0.263855		43GluHN-H	0.402173		43EN-H	0.508845
43GLUN-H	0.897727		44ARGN-H	0.60444		44ArgHN-H	0.424725		44ARGN-H	0.409451		44RN-H	0.520883		45LysN-NH	0.121804		44ArgHN-H	0.359779		44RN-H	0.52125
44ARGN-H	0.802326		45LYSN-H	0.523176		45LysHN-H	0.295962		45LYSN-H	0.381185		45KN-H	0.51006		46PHEN-H	0.119912		45LysN-NH	0.217453		45KN-H	0.432012
45LYSN-H	0.902985		46PHEN-H	0.629069		46PheHN-H	0.187821		46PHEN-H	0.390871		46FN-H	0.320126		47LysHN-H	0.141573		46PHEN-H	0.242366		46FN-H	0.219311
46PHEN-H	0.893805		47LYSN-H	0.381942		47LysHN-H	0.0289306		47LYSN-H	0.149549		47KN-H	0.325301		48GlnHN-H	0.179776		47LysHN-H	0.178716		47KN-H	0.087767
47LYSN-H	0.973294		48GLNN-H	0.301784		48GlnHN-H	0.130153		48GLNN-H	0.130721		48QN-H	0.474491		49_VALN-H	0.118077		48GlnHN-H	0.181433		48QN-H	0.0491853
48GLNN-H	1.00815		49VALN-H	0.44875		49ValHN-H	0.145901		49VALN-H	0.118476		50AN-H	0.389953		50_ALHN-H	0.340233		49ValHN-H	0.135719		49VN-H	0.0282432
49VALN-H	0.945504		50ALAN-H	0.51811		50AlaHN-H	0.202993		50ALAN-H	0.0498003		51EN-H	0.315811		51GluN-NH	0.305837		50AlaN-NH	0.270908		50AN-H	0.0180897
50ALAN-H	0.975186		51GLUN-H	0.585494		51GluHN-H	0.273064		51GLUN-H	0.085865		52AN-H	0.251672		52AlaHN-H	0.292536		51GluN-NH	0.221867		51EN-H	0.498511
51GLUN-H	0.917241		52ALAN-H	0.509049		52AlaHN-H	0.199099		52ALAN-H	0.223771		53YN-H	0.283503		53TyrHN-H	0.247918		52AlaN-H	0.325235		52AN-H	0.598143
52ALAN-H	0.949198		53TYRN-H	0.56131		53TyrHN-H	0.148891		53TYRN-H	0.241196		54EN-H	0.17942		54GluN-NH	0.238285		53TyrHN-H	0.404339		53YN-H	0.405632
53TYRN-H	1.00494		54GLUN-H	0.50488		54GluHN-H	0.18709		54GLUN-H	0.210754		55VN-H	0.207833		54GluN-NH	0.253371		54GluN-NH	0.427469		54EN-H	0.49792
54GLUN-H	0.952381		55VALN-H	0.510953		55ValHN-H	0.304764		55VALN-H	0.160415		56LN-H	0.466336		55ValHN-H	0.222814		55ValHN-H	0.451742		55VN-H	0.60473
55VALN-H	0.955		56LEUN-H	0.518546		56LeuHN-H	0.587554		56LEUN-H	0.367802		57SN-H	0.544868		56LeuHN-H	0.361545		56LeuHN-H	0.56169		56LN-H	0.567054
56LEUN-H	0.937853		57SERN-H	0.589424		57SerHN-H	0.761031		57SERN-H	0.578498		58DN-H	0.662167		57SerHN-H	0.39537		57SerHN-H	0.491518		57SN-H	0.555155
57SERN-H	0.918367		58ASPN-H	0.480708		58AspHN-H	0.718698		58ASPN-H	0.433435		59AN-H	0.676445		58AspHN-H	0.420797		58AspHN-H	0.517186		58DN-H	0.719674
58ASPN-H	0.982323		59ALAN-H	0.580648		59AlaHN-H	0.861321		59ALAN-H	0.617976		60KN-H	0.656959		59AlaHN-H	0.517318		59AlaHN-H	0.633948		59AN-H	0.695176
59ALAN-H	0.909091		60LYSN-H	0.596973		60LysHN-H	0.890692		60LYSN-H	0.682983		61KN-H	0.415885		60LysN-H	0.516733		60LysN-H	0.643544		60KN-H	0.701036
60LYSN-H	0.836576		61LYSN-H	0.512994		61LysHN-H	0.733824		61LYSN-H	0.644753		62RN-H	0.425752		61LysHN-H	0.43992		61LysHN-H	0.466763		61KN-H	0.615081
61LYSN-H	0.923541		62ARGN-H	0.499402		62ArgHN-H	0.499864		62ARGN-H	0.580875		63DN-H	0.411152		62ArgN-HN	0.40655		62ArgN-H	0.490859		62RN-H	0.514198
62ARGN-H	0.969697		63ASPN-H	0.553255		63AspHN-H	0.573724		63ASPN-H	0.44299		64IN-H	0.460494		63AspHN-H	0.525366		63AspHN-H	0.538203		63DN-H	0.628403
63ASPN-H	0.836028		64ILEN-H	0.537834		64ILEN-H	0.523657		64ILEN-H	0.490659		65YN-H	0.489699		64IleHN-H	0.549533		64IleHN-H	0.576066		64IN-H	0.604609
64ILEN-H	0.973684		65TYRN-H	0.44596		65TyrHN-H	0.635532		65TYRN-H	0.502808		66DN-H	0.473048		65TyrHN-H	0.504122		65TyrHN-H	0.490008		65YN-H	0.582792
65TYRN-H	0.972332		66ASPN-H	0.600794		66AspHN-H	0.837343		66ASPN-H	0.468367		67KN-H	0.23323		66AspHN-H	0.499275		66AspHN-H	0.575188		66DN-H	0.655833
66ASPN-H	0.840426		67LYSN-H	0.486307		67LysHN-H	0.788369		67LYSN-H	0.557008		68YN-H	0.344914		67LysHN-H	0.370544		67LysHN-H	0.505374		67KN-H	0.674484
67LYSN-H	0.962751		68TYRN-H	0.305824		68TyrHN-H	0.611623		68TYRN-H	0.509984		68YN-H	0.513203		68TyrHN-H	0.25655		68TyrHN-H	0.446479		68YN-H	0.833624
68TYRN-H	0.995327		69GLYN-H	0.303084		69GlyHN-H	0.410845		69GLYN-H	0.379173		69GN-H	0.412275		69GlyHN-H	0.385026		69GlyHN-H	0.47714		69GH-H	0.85
69GLYN-H	0.931694		70LYSN-H	0.197534		70LysHN-H	0.228437		70LYSN-H	0.203743		70KN-H	0.162119		70LysHN-H	0.1522		70LysHN-H	0.130114		70KN-H	0.88
70LYSN-H	0.79697		71GLUN-H	0.253659		71GluHN-H	0.108509		71GLUN-H	0.238748		71EN-H	0.161385		71GluHN-H	0.172483		71GluHN-H	0.207746		71EN-H	0.9
71GLUN-H	0.89633		72GLYN-H	0.287807		72GlyHN-H	0.275372		72GlyN-H	0.165404		72GN-H	0.146996		72GlyHN-H	0.163368		72GlyHN-H	0.310152		72GN-H	0.93
72GLYN-H	0.910072		73LEUN-H	0.563819		73LeuHN-H	0.483638		73LEUN-H	0.0795018		73LN-H	0.243959		73LeuHN-H	0.426029		73LeuHN-H	0.565324
73LEUN-H	0.824289		75GLYN-H	0.790446		75GLYN-H	1.28572		74ASNN-H	0.0723224		74NN-H	0.185616		74AsnHN-H	0.702056		74AsnHN-H	0.53126
74ASNN-H	0.905182		76GLYN-H	0.905094		76GLYN-H	1.44646		75GLYN-H	0.534644		75GN-H	0.787954		75GlyHN-H	0.649295		75GlyHN-H	0.698769
75GlyN-H	0.908737		77GLYN-H	0.907651		77GLYN-H	1.23121		76GLYN-H	0.795392		76GN-H	0.90342		76GlyNN-H	0.651506		76GlyNN-H	0.677177
79GlyN-H	0.954733		78GLYN-H	0.937599		78GLYN-H	1.03111		77GLYN-H	0.818253		77GN-H	0.915038		79GlyHN-H	0.647568		79GlyHN-H	0.675836
80GlyN-H	0.992183		79GLYN-H	0.846902		79GLYN-H	1.15914		78GLYN-H	0.958199		78GN-H	0.961188		83_PHEN-H	0.442646		83PheHN-H	0.562738
81SERN-H	0.979821		83PheN-H	0.874448		83PHEN-H	0.959408		79GLYN-H	0.894497		79GN-H	0.95369		84AspHN-H	0.456951		84AspHN-H	0.395192
82HisN-H	0.988172		84ASPN-H	0.97515		83PheHN-H	1.37312		83PHEN-H	0.983519		83FN-H	0.72709		85SerHN-H	0.401065		85SerHN-H	0.298793
83PHEN-H	0.941606		85SERN-H	0.917798		84AspHN-H	1.10244		84ASPN-H	0.976232		84DN-H	0.736209		87_PHEN-H	0.388859		87FN-H	0.256731
84ASPN-H	0.951076		87PHEN-H	0.645842		85SerHN-H	0.991226		85SERN-H	0.848568		85SN-H	0.685365		88_GLUN-H	0.424759		88EN-H	0.278235
85SERN-H	0.958824		88GLUN-H	0.657404		87PheHN-H	0.904916		87PHEN-H	0.606547		87FN-H	0.688139		89_PHEN-H	0.401683		89FN-H	0.296621
87PHEN-H	0.911111		90GLYN-H	0.589569		88GluHN-H	0.962221		88GLUN-H	0.601077		88EN-H	0.518961		90GlyHN-H	0.369058		90GlyHN-H	0.363653
88GLUN-H	0.836898		91PHEN-H	0.605673		89ILEN-H	0.699846		89ILEN-H	0.686974		89FN-H	0.533284		91PheHN-H	0.321219		91PheHN-H	0.462856
89PHEN-H	0.933333		92THRN-H	0.646621		90GlyHN-H	0.674755		90GLYN-H	0.631121		90GN-H	0.624444		92ThrHN-H	0.371743		92ThrHN-H	0.420267
90GLYN-H	0.896061		93PHEN-H	0.661341		91PheHN-H	0.500089		91PHEN-H	0.260469		91FN-H	0.689037		93PheHN-H	0.406502		93PheHN-H	0.579013
91PHEN-H	0.975904		94ARGN-H	0.694832		92ThrHN-H	0.168928		92THRN-H	0.139186		92TN-H	0.663552		95_ASNN-H	0.388412		95NN-H	0.697473
92THRN-H	0.916667		95ASNN-H	0.65315		93PheHN-H	0.328801		93PHEN-H	0.146067		93FN-H	0.698566		97AspHN-H	0.433543		97AspHN-H	0.490208
93PHEN-H	1.06338		97ASPN-H	0.466799		94ArgHN-H	0.554501		94ARGN-H	0.13179		95NN-H	0.58743		98AspHN-H	0.469755		98AspHN-H	0.548598
94ARGN-H	0.956757		98ASPN-H	0.530341		95AsnHN-H	0.333054		95ASNN-H	0.277034		97DN-H	0.634248		99ValHN-H	0.361462		99ValHN-H	0.488392
95ASNN-H	1		99VALN-H	0.426651		97AspHN-H	0.291067		97ASPN-H	0.259869		98DN-H	0.640234		100_PHEN-H	0.376116		F100N-H	0.515481
97ASPN-H	1.01058		100PHEN-H	0.440362		98AspHN-H	0.278975		98ASPN-H	0.174512		99VN-H	0.659895		101_ARGN-H	0.522637		101RN-H	0.514664
98ASPN-H	0.927778		101ARGN-H	0.561361		99ValHN-H	0.105663		99VALN-H	0.181593		100FN-H	0.669025		102_GLUN-H	0.479251		102GluN-HN	0.621662
99VALN-H	1		102GLUN-H	0.617676		100PHEN-H	0.415604		100PHEN-H	0.156493		101RN-H	0.782654		103PheN-HN	0.777396		103PheN-H	0.777941
100PHEN-H	0.980488		103PHEN-H	0.641859		101ARGN-H	0.408885		102GLUN-H	0.167955		102EN-H	0.747135		104_PHEN-H	0.733748		104PheN-NH	0.745015
101ARGN-H	0.949206		104PHEN-H	0.559415		102GLUN-H	0.193755		103PHEN-H	0.593761		103FN-H	0.763942		105GlyN-H	0.785741		105GlyN-H	0.84115
102GLUN-H	0.946341		105GLYN-H	0.618868		103PheHN-H	0.320811		104PHEN-H	0.651477		104FN-H	0.628349		106GlyN-H	0.815633		106GlyN-H	0.762625
103PHEN-H	0.879245		106GLYN-H	0.933709		104PheHN-H	0.161863		105GLYN-H	0.564731		105GN-H	0.91475		107ArgN-H	0.87071		107ArgN-H	0.876418
104PHEN-H	0.979048		107ArgN-H	1.06113		105GlyHN-H	0.199584		106GLYN-H	0.973406		106GN-H	1.10919		108AspN-H	0.901702		108AspN-H	1.09062
105GLYN-H	0.997788		108ASPN-H	1.06079		106GlyHN-H	1.07664		107ArgN-H	0.830155		107RN-H	1.08425
106GLYN-H	0.876106					107ArgHN-H	1.03421		108ASPN-H	0.983424		108DN-H	1.18287
107ARGN-H	0.934951					108AspHN-H	1.18936
108ASPHN-H	0.944937

## Sheet: Fig5cd
Figure 5 panels c and d source data
DNAJB6 monomer WT + Hsp70				DNAJB6 monomer A50V + Hsp70
Assignments	I/I0			Assignments	I/I0
M1CE	0.824434			M1CE	1.08378
V2CG1	0.700989			V2CG1	0.744335
V2CG1	0.696142			V2CG1	0.588737
V7CG1	0.691757			V7CG1	0.322747
V7CG2	0.651813			V7CG2	0.339789
L8CD1	0.740986			L8CD1	0.398586
L8CD2	0.725522			L8CD2	0.271082
V10CG1	0.689957			V10CG1	0.303851
V10CG2	0.747697			V10CG2	0.422083
I19CD1	0.763499			I19CD1	0.438227
L26CD1	0.70441			L26CD1	0.157048
L26CD2	0.671035			L26CD2	0.256928
L28CD1	0.754402			L28CD1	0.126747
L28CD2	0.72246			L28CD2	0.0979765
V49CG1	0.721373			V49CG1	0.283104
V49CG2	0.821143			V49CG2	0.26395
V55CG2	0.76192			V50CG1	0.0710158
V55CG2	0.828246			V50CG2	0.218718
L56CD1	0.646138			V55CG1	0.126035
L56CD2	0.715915			V55CG2	0.0486151
I64CD1	0.770839			L56CD1	0.367067
L73CD1	0.82357			L56CD2	0.308593
L73CD2	0.718254			I64CD1	0.383062
V99CG1	0.73096			L73CD1	0.347482
V99CG2	0.778817			L73CD2	0.10411
M185CE	0.722558			V99CG1	0.52693
I191CD1	0.709145			V99CG2	0.550404
M195CE	0.700022			I191CD1	1.01712
V198CG1	0.791764			V198CG1	1.00438
V198CG2	0.80629			V198CG2	0.987808
I203CD1	0.839294			I203CD1	1.05843
I208CD1	0.855539			I208CD1	1.24206
V209CG1	0.81			V209CG1	0.957657
V209CG2	0.83			V209CG2	1.05714
V216CG1	0.812645			V216CG1	1.00131
V216CG2	0.747311			V216CG2	1.05296
V218CG1	0.717322			V218CG1	1.01191
V218CG2	0.722157			V218CG2	1.03335
L224CD1	0.706018			L224CD1	0.945206
L224CD2	0.741228			L224CD2	0.872688
L227CD1	0.865093			L227CD1	0.934997
L227CD2	0.87384			L227CD2	0.954727
I229CD1	0.743291			I229CD1	0.965865
L235CD1	0.780235			I229bCD1	1.12141
L235CD1	0.702008			L235CD1	0.855121
L236CD1	0.802652			L235CD1	0.970508
L236CD2	0.866197			L236CD1	1.0685
L238CD2	0.709821			L236CD2	1.03482
L238CD2	0.791308			L238CD2	0.831058
				L238CD2	0.836723

## Sheet: Fig5e
Figure 5 panel e source data
		repeat 1	repeat 2	repeat 3	repeat 4	repeat 5	Average	Err
	Hsp70	0.544485	0.526151	0.569565	0.467724	0.51	0.523585	0.0433279		6.67322
	Hsp70 + DNAJB6 mono	0.535	0.51	0.61	0.5	0.49	0.529	0.0497284
	Hsp70 + DNAJB6 A50V mono	3.83	3.66	2.86	3.53	3.59	3.494	0.424814

## Sheet: Fig6a
Figure 6 panel a source data
		repeat 1	repeat 2	repeat 3	repeat 4	repeat 5	Average	error	fold of activation
	Hsp70	0.477722	0.447864	0.507579	0.49265	0.552366	0.495636	0.0345627	1
	WT	0.716582	0.776298	0.716582	0.507579	0.761369	0.695682	0.0970257	1.40361
	QPN	0.62701	0.74644	0.686725			0.686725	0.0487573	1.38554
	F89I		0.880799	0.74644	0.970372		0.86587	0.0920273	1.74699
	F91L	1.13459	1.22416	0.910657	1.16445		1.10846	0.11867	2.23645
	F93L	1.26895	1.41824	1.64217			1.44312	0.153379	2.91165
	P96R	2.03032	2.38861	2.43339	2.26918		2.28037	0.156352	4.6009
	A50V	2.52297	2.55282	2.50804	2.68718		2.56775	0.0708135	5.18072
	F100V	2.89619	3.20969	2.61254	2.7469		2.86633	0.222183	5.78313

## Sheet: Fig6b
Figure 6 panel b source data
DNAJB6 F100V				DNAJB6 A50V				DNAJB6 P96R				DNAJB6 F93L				DNAJB6 F91L				DNAJB6 F89I			DNAJB6 WT
Conc. [uM]	FP	Err		Conc. [uM]	FP	Err		Conc. [uM]	FP	Err		Conc. [uM]	FP	Err		Conc. [uM]	FP	Err		Conc. [uM]	FP		Conc. [uM]	FP
500	39	0.5		500	37.4	1.4		1000	36.4	1.9		1000	29.6667	2.08167		1800	21.5	3.77492		1700	18		1400	17
250	39.6667	0.763763		250	36.3	2.9		500	33.6	2.38		500	26	1		900	16.5	3.12917		1000	10		1000	11.5
125	37.3333	0.57735		125	31.9	0.5		250	29.4	0.87735		250	21.3333	0.57735		450	14	3.32916		500	9		500	9
62.5	36	1		62.5	27.5	1.3		125	25.2	1.12753		125	17.3333	1.52753		225	9.5	2.48144		250	5		250	7
31.25	34	1		31.25	23.1	2.4		62.5	21	2.1		62.5	14	1		112.5	8	3.04138		125	3		125	3
15.625	29.3333	0.57735		15.625	19.8	0.9		31.25	18.2	1.52753		31.25	11.3333	1.52753		56.25	7	2.51661		62.5	3		62.5	1.5
7.8125	26	1		7.8125	16.5	1.1		15.625	14	0.77735		15.625	9.66667	0.57735		28.125	6.5	3.81881		31.25	1.08333		31.25	2
3.90625	21.3333	1.52753		3.90625	14.3	1.4		7.8125	11.2	1.8		7.8125	8	2		14.0625	5	2.29129		15.625	1.25		15.625	1
1.95312	16	1		1.95313	11	0.8		3.90625	8.4	1		3.90625	6	1		7.03125	3.5	2.51661		7.8125	0.916667		7.8125	1.5
0.976562	10.6667	0.57735		0.97656	7.7	1		1.95313	5.6	1.0547		1.95312	3.66667	1.1547		3.51562	2.5	2.78388		3.90625	1		3.90625	2
0.488281	6.66667	0.57735		0.48828	5.5	0.5		0.97656	7	3		0.976562	5	2		1.75781	1.5	2.25462		1.95312	2		1.95312	1
0.244141	3.33333	0.57735		0.24414	3.3	1		0.48828	2.8	1		0.488281	2	1		0.878906	1	0.763763		0.976562	1		0.976562	0
0.12207	1.33333	0.57735		0.12207	1.1	1.5		0.24414	2.8	0		0.244141	2	0		0.439453	0.5	1.25831		0.488281	1		0.488281	0
0.0610352	1.33333	1.1547		0.06104	1.1	0.33		0.12207	1.4	1		0.12207	1	1		0.219727	0	1.73205		0.244141	0		0.244141	0.5
0.0305176	0	0		0.03052	0	0.33		0.06104	0	0.57735		0.0610352	0.666667	0.57735		0.109863	0.5	0		0.12207	0		0.12207	0
0.0152588	0.666667	0.57735		0.01526	0	0		0.03052	0	0.57735		0.0305176	0.333333	0.57735		0.0549316	0	0.763763		0.0610352	0		0.0610352	0
0.00762939	1.33333	0.57735		0.00763	0	1		0.01526	0	0.57735		0.0152588	0.333333	0.57735		0.0274658	0	0.57735		0.0305176	0.0833333		0.0305176	0
0.0038147	0.666667	0.57735		0.00381	0	0		0.00763	0	0.57735		0.00762939	0.333333	0.57735		0.0137329	0	0		0.0152588	0.0833333		0.0152588	0
0.00190735	0	0		0.00191	0	0		0.00381	0	0		0.0038147	0	0		0.00686646	0	0		0.00762939	0		0.00762939	0
																0.00343323	0.5	1.25831		0.0038147	0.0833333		0.0038147	0

## Sheet: FigS1c
Supplementary Figure 1 panel c source data
polyQ aggregation half times
	repeat 1	repeat 2	repeat 3	repeat 4	average	error
No chaperone	208	247	213	187	213.75	24.8646
DNAJB6 WT	360	380	370	326	359	23.4663
DNAJB6 P96R	346	414	389	312	365.25	45.265

## Sheet: FigS2
Supplementary Figure 2 source data
DNAJB6 JD-GF F89I vs WT			DNAJB6 JD-GF F91I vs WT			DNAJB6 JD-GF F93L vs WT			DNAJB6 JD-GF P96R vs WT			DNAJB6 JD-GF E54A vs WT			DNAJB6 JD-GF A50V vs WT			DNAJB6 JD-GF F100V vs WT			DNAJB6 JD vs DNAJB6 JD-GF
Assignments	CSPs		Assignments	CSPs		Assignments	CSPs		Assignments	CSPs		Assignments	CSPs		Assignments	CSPs		Assignments	CSPs		Assignments	CSPs
3ASPN	0.013927		3Asp	0.0807847		3ASP	0.0584123		3D	0.100125		3D	0.0421445		3Asp	0.10142		3Asp	0.0883559		3D	0.00900222
4TYRN	0.0250352		4Tyr	0.121268		4TYR	0.120921		4Y	0.139129		4Y	0.0675186		4Tyr	0.167679		4Tyr	0.184493		4Y	0.0713442
5TYRN	0.019226		5Tyr	0.0499075		5TYR	0.0806583		5Y	0.0702285		5Y	0.0596235		5Tyr	0.108205		5Tyr	0.0966		5Y	0.0475348
6GLUN	0.0230903		6Glu	0.0373363		6GLU	0.0565972		6E	0.0764829		6E	0.0632664		6Glu	0.108462		6Glu	0.109795		6E	0.0977151
7VALN	0.0104995		7Val	0.0487643		7VAL	0.0361087		7V	0.0695701		7V	0.0515632		7Val	0.0817787		7Val	0.0721446		7V	0.0556475
8LEUN	0.00693109		8Leu	0.0184272		8LEUN	0.00466476		8L	0.0144069		8L	0.0353553		8Leu	0.00806226		8Leu	0.0240416		8L	0.0457056
9GLYN	0.0100499		9Gly	0.00812158		9GLY	0.0476105		9G	0.0594811		9G	0.044157		9Gly	0.0815326		9Gly	0.0824497		9G	0.0632863
10VAL	0.00604649		10Val	0.0135484		10VAL	0.0279686		10V	0.0343796		10V	0.0407082		10Val	0.0403113		10Val	0.0407181		10V	0.0308869
11GLN	0.0231249		11Gln	0.00816333		11GLN	0.0156218		11Q	0.0409663		11Q	0.0335058		11Gln	0.0347252		11Gln	0.0379178		11Q	0.0170985
12ARG	0.005004		12ARG	0.00524976		12ARG	0.0222612		12R	0.0516097		12R	0.0052		12Arg	0.0297059		12Arg	0.0269258		12R	0.0427649
13HIS	0.00269072		13His	0.00594643		13HIS	0.030398		13H	0.0568802		13H	0.009		13His	0.0499764		13His	0.0446515		13H	0.0676074
14ALA	0.00524976		14Ala	0.0202475		14ALA	0.0134402		14A	0.052		14A	0.0120416		14Ala	0.0144554		14Ala	0.00417612		14A	0.0050636
15SER	0.00936803		15Ser	0.0151539		15SER	0.0414367		15S	0.0876		15S	0.0518262		15Ser	0.133372		15Ser	0.125192		15S	0.147435
17GLU	0.019986		17Glu	0.0208125		17GLU	0.0380789		17E	0.100534		17E	0.0748131		17Glu	0.128529		17Glu	0.136044		17E	0.140523
18ASP	0.00954149		18Asp	0.0316285		18ASP	0.00896437		18D	0.0477598		18D	0.0307695		18Asp	0.0510063		18Asp	0.0496633		18D	0.0601082
19ILE	0.0116516		19Ile	0.0189589		19ILE	0.0120814		19I	0.0710664		19I	0.054176		19Ile	0.146066		19Ile	0.141145		19I	0.151064
20LYS	0.00925419		20Lys	0.0253211		20LYS	0.0118929		20K	0.118186		20K	0.112618		20Lys	0.117949		20Lys	0.103704		20K	0.121872
21LYS	0.00328024		21Lys	0.0288139		21LYS	0.02628		21K	0.0831538		21K	0.0692892		21Lys	0.110483		21Lys	0.110305		21K	0.133613
22ALA	0.0170294		22Ala	0.0321409		22ALA	0.056422		22A	0.0612679		22A	0.0412311		22Ala	0.0726694		22Ala	0.0901042		22A	0.0832368
23TYR	0.0126507		23Tyr	0.0228219		23TYR	0.0617692		23Y	0.0998921		23Y	0.0463793		23Tyr	0.108416		23Tyr	0.117888		23Y	0.136961
24ARG	0.00316228		24Arg	0.0169009		24ARG	0.0232215		24R	0.124722		24R	0.0412146		24Arg	0.0900002		24Arg	0.125174		24R	0.153695
25LYS	0.0170751		25Lys	0.0518941		25LYS	0.0707248		25K	0.442707		25K	0.209993		25Lys	0.411852		25Lys	0.607399		25K	0.787223
26LEU	0.0161555		26Leu	0.0245552		26LEU	0.0790281		26L	0.226691		26L	0.158647		26Leu	0.103477		26Leu	0.21871		26L	0.273103
27ALA	0.00412311		27Ala	0.00335261		27ALA	0.0606897		27A	0.195344		27A	0.122197		27Ala	0.299728		27Ala	0.387998		27A	0.447941
28LEU	0.00608276		28Leu	0.0321055		28LEU	0.0257752		28L	0.326875		28L	0.155955		28Leu	0.450166		28Leu	0.496977		28L	0.635217
29LYS	0.0355128		29LYS	0.0363918		29LYS	0.0406674		29K	0.131427		29K	0.0333443		29Lys	0.202955		29Lys	0.115802		29K	0.0710518
30TRP	0.00704557		30TRP	0.0197231		30TRP	0.0292062		30W	0.070824		30W	0.0115169		30TrpH-HE	0.0974936		30Trp	0.0647089		30TRP	0.101977
30TRP	0.00943398		30Trp	0.00447214		31His	0.0353163		31	0.190598		31	0.0823155		31His	0.227276		31His	0.228358		31	0.173853
31HIS	0.00208806		31His	0.00707107		33ASP	0.0540059		33D	0.240977		33D	0.105119		33Asp	0.279021		33Asp	0.34117		33D	0.440407
33ASP	0.0111803		33Asp	0.0133417		34LYS	0.012839		34K	0.0532744		34K	0.033455		34Lys	0.0931453		34Lys	0.0692202		34K	0.0688401
34LYS	0.0174287		34LYS	0.0259615		35ASN	0.043672		35N	0.166628		35N	0.0364905		35Asn	0.156756		35Asn	0.147044		35N	0.144448
35ASN	0.0400245		35ASN	0.0195182		37GLU	0.0492439		37E	0.0192354		37E	0.0289614		37Glu	0.0197018		37Glu	0.0261847		37E	0.0366502
37GLU	0.0237453		37Glu	0.00613514		38ASN	0.0302662		38N	0.111682		38N	0.0496488		38Asn	0.147599		38Asn	0.147852		38N	0.13262
38ASN	0.0278029		38ASN	0.0307435		39LYS	0.0388515		39K	0.106925		39K	0.0280064		39Lys	0.101057		39Lys	0.10301		39K	0.111235
39LYS	0.0111517		39Lys	0.0229513		40GLU	0.0584958		40E	0.0300167		40E	0.0263697		40Glu	0.0434078		40Glu	0.0450994		40E	0.0906309
40GLU	0.00616117		40Glu	0.0134536		41GLU	0.070214		41E	0.0831502		41E	0.0677808		41Glu	0.0409238		41Glu	0.0543529		41E	0.0789605
41GLU	0.0203066		41Glu	0.0315905		42ALA	0.0163878		42A	0.0918218		42A	0.0351232		42Ala	0.0654		42Ala	0.0450444		42A	0.0148647
42ALA	0.008		42Ala	0.026		43GLU	0.0300892		43E	0.111015		43E	0.0508759		43Glu	0.096026		43Glu	0.14327		43E	0.18679
43GLU	0.00411825		43Glu	0.0136953		44ARG	0.0584411		44R	0.139254		44R	0.0646557		44Arg	0.188075		44Arg	0.143997		44R	0.123971
44ARG	0.00453431		44Arg	0.0183848		45LYS	0.0780651		45K	0.136427		45K	0.0958853		45Lys	0.112671		45Lys	0.137768		45K	0.113136
45LYS	0.00829699		45Lys	0.005		46PHE	0.0246163		46F	0.0427102		46F	0.124904		46PHE	0.0850621		46PHE	0.100503		46F	0.120426
46PHE	0.00746726		46Phe	0.0229965		47LYS	0.0341883		47K	0.345779		47K	0.158079		47Lys	0.562143		47Lys	0.342783		47K	0.323693
47LYS	0.00704557		47Lys	0.0419829		48GLN	0.0926026		48Q	0.407726		48Q	0.0761877		48Gln	0.391467		48Gln	0.157432		48Q	0.217486
48GLN	0.012		48Gln	0.093215		49VAL	0.0893944		50A	0.691003		50A	0.322064		49_VAL	0.753812		49Val	0.580941		49V	0.537669
49VAL	0.00816333		49Val	0.0326827		50ALA	0.24815		51E	0.28226		51E	0.383424		50_AL	0.895017		50Ala	0.705039		50A	0.753157
50ALA	0.00407922		50Ala	0.0311602		51GLU	0.0989545		52A	0.281262		52A	0.37811		51Glu	0.305039		51Glu	0.296001		51E	0.349317
51GLU	0.0147092		51Glu	0.0678012		52ALA	0.18153		53Y	0.125802		53Y	0.59681		52Ala	0.290774		52Ala	0.302789		52A	0.478257
52ALA	0.0219317		52Ala	0.0263105		53TYR	0.0358586		54E	0.45833		54E	0.591982		53Tyr	0.190591		53Tyr	0.14419		53Y	0.119624
53TYR	0.00203961		53Tyr	0.0195816		54GLU	0.234542		55V	0.239115		55V	0.209619		54Glu	0.159524		54Glu	0.461506		54E	0.598097
54GLU	0.0223607		54Glu	0.0636314		55VAL	0.213455		56L	0.0640378		56L	0.146367		55Val	0.360507		55Val	0.364097		55V	0.511255
55VAL	0.0208701		55Val	0.0479141		56LEU	0.103112		57S	0.0698324		57S	0.0856526		56Leu	0.10617		56Leu	0.0877838		56L	0.132258
56LEU	0.0480108		56Leu	0.0764199		57SER	0.04981		58D	0.106471		58D	0.116528		57Ser	0.124252		57Ser	0.110622		57S	0.128922
57SER	0.0108462		57Ser	0.0392255		58ASP	0.0573847		59A	0.0410488		59A	0.0281325		58Asp	0.17557		58Asp	0.165359		58D	0.139081
58ASP	0.0104995		58Asp	0.0961653		59ALA	0.0210609		60K	0.0244369		60K	0.0228254		59Ala	0.0670361		59Ala	0.0638047		59A	0.0514467
59ALA	0.00905539		59Ala	0.004		60LYS	0.0284703		61K	0.176155		61K	0.0571545		60Lys	0.0502195		60Lys	0.0492215		60K	0.0959085
60LYS	0.0223607		60Lys	0.0781181		61LYS	0.0782736		62R	0.089099		62R	0.0840288		61Lys	0.163087		61Lys	0.1697		61K	0.221732
61LYS	0.0212132		61Lys	0.115991		62ARG	0.0605908		63D	0.0665555		63D	0.0837033		62Arg	0.137492		62Arg	0.11921		62R	0.394384
62ARG	0.0583178		62Arg	0.0925929		63ASP	0.0612278		64I	0.0855151		64I	0.0880111		63Asp	0.126738		63Asp	0.118671		63D	0.254018
63ASP	0.0341321		63Asp	0.0615691		64ILE	0.0193039		65Y	0.0725261		65Y	0.0763319		64Ile	0.142759		64Ile	0.129966		64I	0.289855
64ILE	0.0871415		64ILE	0.109355		65TYR	0.051207		66D	0.0339706		66D	0.061413		65Tyr	0.145656		65Tyr	0.118533		65Y	0.485143
65TYR	0.0760516		65Tyr	0.070446		66ASP	0.0290689		67K	0.171608		67K	0.155258		66Asp	0.0880611		66Asp	0.0943262		66D	0.243322
66ASP	0.0623776		66Asp	0.108981		67LYS	0.136494		68Y	0.303077		68Y	0.152144		67Lys	0.369593		67Lys	0.276511		67K	0.26567
67LYS	0.074679		67Lys	0.190434		68TYR	0.193875		69G	0.0612369		69G	0.062367		68Tyr	0.581816		68Tyr	0.553231		68Y	0.163565
68TYR	0.10108		68Tyr	0.346326		69GLY	0.0280064		70K	0.518657		70K	0.232006		69Gly	0.12245		69Gly	0.114996
69GLY	0.0214159		69Gly	0.0998649		70LYS	0.204255		71E	0.212831		71E	0.170733		70Lys	0.484076		70Lys	0.459004
70LYS	0.0217265		70Lys	0.395842		71GLU	0.163808		72G	0.2697		72G	0.24168		71Glu	0.391124		71Glu	0.365372
71GLU	0.0974123		71Glu	0.28809		72Gly	0.245728		73L	0.107231		73L	0.113388		72Gly	0.486118		72Gly	0.468027
72GLY	0.100439		72Gly	0.345566		73LEU	0.0253211		74N	0.010198		74N	0.0713863		73Leu	0.23039		73Leu	0.201477
73LEU	0.0383192		73Leu	0.157529		74ANS	0.010198		75G	0.0486637		75G	0.0174929		74ANS	0.010198		74Asn	0.1
74ASN	0.0418884		74ASN	0.377445		75GLY	0.0250647		76G	0.0464866		76G	0.025664		75Gly	0.0550669		75Gly	0.0430116
75GLY	0.0270141		75GLY	0.0167631		76GLY	0.0382884		77G	0.022		77G	0.0161555		76GlyN	0.0700588		76GlyN	0.0413323
76GLY	0.0490408		76GLY	0.0430116		77GLY	0.022		78G	0.00203961		78G	0.0170294		77GLY	0.022		77GLY	0.022
77GLY	0.0276449		77GLY	0.0124483		78GLY	0.00203961		79G	0.0226416		79G	0.00910824		78GLY	0.00203961		78GLY	0.00203961
78GLY	0.0308474		78GLY	0.0246203		79GLY	0.00652993		81S	0.0060959		81SER	0.004		79Gly	0.0104		79Gly	0.0213551
79GLY	0.0227297		79GLY	0.0168238		81SER	0.0060959		82H	0.00282843		82HIS	0.012		81SER	0.0060959		81SER	0.0060959
81SER	0.00483322		81SER	0.00551725		82HIS	0.00282843		83F	0.118175		83F	0.015		82HIS	0.00282843		82HIS	0.00282843
82His	0.00781025		82His	0.00316228		83PHE	0.0706586		84D	0.0403629		84D	0.0213251		83_PHE	0.0488594		83Phe	0.00905539
83PHE	0.0188404		83PHE	0.0170575		84ASP	0.0404599		85S	0.0699789		85S	0.0176918		84Asp	0.018071		84Asp	0.0272426
84ASP	0.0129321		84Asp	0.0210038		85SER	0.0382884		87F	0.152597		87F	0.0820549		85Ser	0.0772241		85Ser	0.0663991
85SER	0.0135882		85Ser	0.0304631		87PHE	0.289939		88E	0.132751		88E	0.0771891		87_PHE	0.134787		87F	0.115694
87PHE	0.237196		87Phe	0.109097		88GLU	0.269898		89F	0.132179		89F	0.0594337		88_GLU	0.166908		88E	0.155793
88GLU	0.283302		88Glu	0.32685		89ILE	0.143753		90G	0.193302		90G	0.1066		89_PHE	0.13228		89F	0.117919
89ILE	0.755642		89Phe	0.25119		90GLY	0.0608276		91F	0.2829		91F	0.231482		90Gly	0.241		90Gly	0.247703
90GLY	0.595309		90Gly	0.206652		91PHE	0.316202		92T	0.185707		92T	0.0756688		91Phe	0.390166		91Phe	0.303944
91PHE	0.225039		91Phe	0.448343		92THR	0.247194		93F	0.330061		93F	0.298579		92Thr	0.123526		92Thr	0.0958198
92THR	0.209936		92Thr	0.121258		93PHE	0.465519		95N	1.51547		95N	0.209617		93Phe	0.411193		93Phe	0.380636
93PHE	0.10687		93Phe	0.174917		94ARG	1.02213		97D	0.888055		97D	0.233985		95_ASN	0.80707		95N	0.897077
94ARG	0.0378122		94Arg	0.14269		95ASN	0.283799		98D	0.236127		98D	0.106004		97Asp	0.611185		97Asp	0.600765
95ASN	0.00921954		95Asn	0.0505573		97ASP	0.107104		99V	0.563954		99V	0.20025		98Asp	0.33408		98Asp	0.346226
97ASP	0.0150851		97Asp	0.0314331		98ASP	0.00800999		100F	0.224047		100F	0.0899324		99Val	0.468712		99Val	0.409026
98ASP	0.00817068		98Asp	0.017095		99VAL	0.0248395		101R	0.358835		101R	0.119		100_PHE	0.222516		F100V	0.267263
99VAL	0.00503587		99Val	0.0284401		100PHE	0.0987267		102E	0.245828		102E	0.118921		101_ARG	0.478516		101R	0.464411
100PHE	0.00746726		100PHE	0.017354		101ARG	0.0603075		103F	0.476806		103F	0.401861		102_GLU	0.293218		102Glu	0.412659
101ARG	0.0117047		101ARG	0.0214672		102GLU	0.044261		104F	0.978098		104F	0.326038		103Phe	0.468615		103Phe	0.473051
102GLU	0.0111803		102GLU	0.0286782		103PHE	0.0621772		105G	0.160093		105G	0.0782072		104_PHE	0.749725		104Phe	0.991631
103PHE	0.0172627		103Phe	0.0278		104PHE	0.0663774		106G	0.0543006		106G	0.0290558		105Gly	0.192766		105Gly	0.222081
104PHE	0.0142562		104Phe	0.0476861		105GLY	0.0469911		107R	0.0433447		107R	0.0167631		106Gly	0.0824621		106Gly	0.106844
105GLY	0.0142843		105Gly	0.0316285		106GLY	0.0307402		108D	0.024508		108D	0.0197677		107Arg	0.0600163		107Arg	0.027136
106GLY	0.0026		106Gly	0.0275347		107Arg	0.0185946								108Asp	0.0134893		108Asp	0.0137201
107GLU	0.0180278		107Arg	0.0379863		108ASP	0.0145602
108ASP	0.022973		108Asp	0.0114018

[truncated: 9 more sheets: FigS3b, FigS5de, FigS6fg, FigS7cd, FigS8, FigS9e, FigS10b, FigS10c, FigS10de]
